# Supplementary material for: A dual functional asymmetric plasmonic silver nanostructure for temperature and magnetic field sensing
Source: Royal Society of Chemistry journal article supplement (doi:10.1039/d3cp01748f), 2023-01-01
Supplement: d3cp01748f1.pdf [file d3cp01748f1.pdf]

## Dual functional asymmetric plasmonic silver nanostructure for temperature and magnetic field sensing

Simitha S,<sup>a</sup> Shinto M Francis,<sup>b</sup> Jesly Jacob\*<sup>b</sup> and Vibin Ipe Thomas\*<sup>a</sup>

<sup>a</sup> Department of Chemistry, CMS College, Kottayam-686001, Kerala, India

<sup>b</sup> Department of Physics, Assumption College, Changanacherry, Kottayam-686101, Kerala, India

### Corresponding Author

Dr. Vibin Ipe Thomas.

[vibin@cmscollege.ac.in](mailto:vibin@cmscollege.ac.in)

Dr. Jesly Jacob

[jeslyjacob@assumptioncollege.edu.in](mailto:jesylyjacob@assumptioncollege.edu.in)

### Supplementary information

**Table S1: Comparison of dual parameter sensitivity of published works**

| Reference | Sensor                                                            | Magnetic field sensitivity (pm/Oe) | Temperature sensitivity (pm/°C) |
|-----------|-------------------------------------------------------------------|------------------------------------|---------------------------------|
| 1         | Photonic crystal fiber plasmonic sensor with dual-polarized modes | 265                                | 1410.7                          |
| 2         | Two channel photonic crystal fiber                                | 65                                 | 2360                            |
| 3         | Dual-core D-shaped photonic crystal fiber                         | 77.9                               | 1151                            |
| 4         | Two open ring channels SPR-PCF                                    | 308.3                              | 6520                            |
| 5         | Dual-channel photonic crystal fiber                               | 1970                               | 5500                            |
| 6         | Trigonal cluster-based ultra-sensitive SPR-PCF                    | 160                                | 1250                            |
| 7         | Fractal cladding PCF-based plasmonic sensor                       | 670                                | 1200                            |
| 8         | This work                                                         | 12663.2                            | 5218                            |

## Fig.S1 Experimental setup diagram of the proposed sensor

In the experimental setup, a broadband optical source is connected to a polarization controller for adjusting the polarization of the light source supplied to the SPR sensor. The sensor is surrounded by two magnets connected to a DC supply and a heat blower to control the magnetic field and temperature around it, respectively. Upon plasmonic excitation, the proposed asymmetric sensor detects the surrounding magnetic field and temperature variations, and the output spectra are analyzed using an optical spectrum analyzer connected to the sensor.

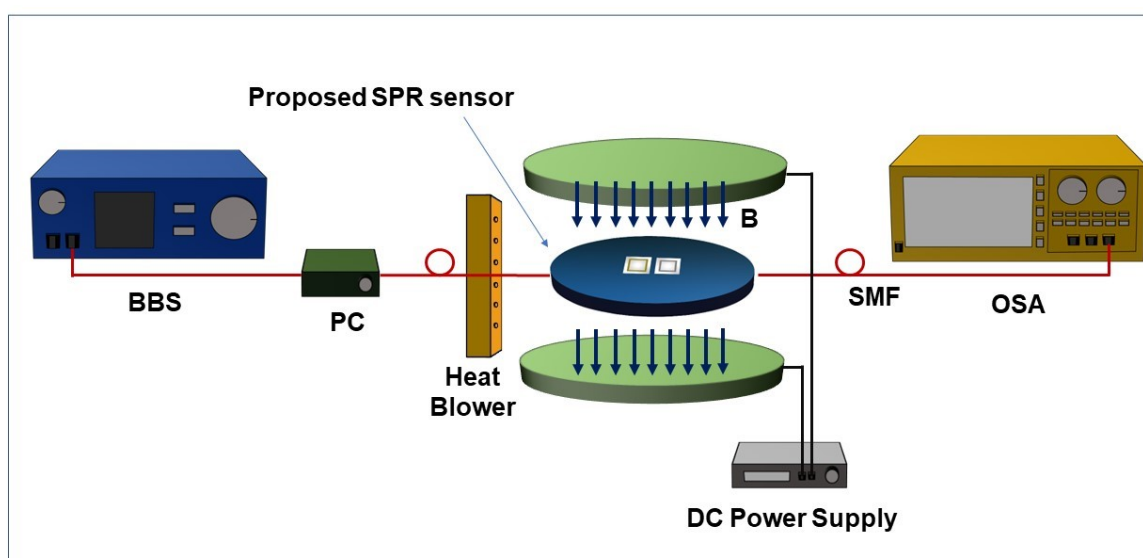

Fig.S1 Experimental setup diagram of the proposed SPR sensor comprising a broadband source (BBS), polarization controller (PC), heat blower, DC power supply, and an optical spectrum analyzer (OSA).

### Reference

- 1 S. Gu, W. Sun, M. Li, Z. Li, X. Nan, Z. Feng and M. Deng, *Optik (Stuttg.)*, 2022, **259**, 169030.
- 2 D. Wang, Z. Yi, G. Ma, B. Dai, J. Yang, J. Zhang, Y. Yu, C. Liu, X. Wu and Q. Bian, *Phys. Chem. Chem. Phys.*, 2022, **24**, 21233–21241.
- 3 J.-K. Wang, Y. Ying, Z.-J. Gao, S.-Y. Cheng and G.-Y. Si, *Instrum. Sci. & Technol.*, 2022, **50**, 271–287.
- 4 D. Wang, W. Zhu, Z. Yi, G. Ma, X. Gao, B. Dai, Y. Yu, G. Zhou, P. Wu and C. Liu, *Opt. Express*, 2022, **30**, 39055–39067.
- 5 J. ; Lv, F. ; Wang, C. ; Hu, L. ; Yang, H. ; Fu, Y. ; Zeng and P. K. ; Chu, , DOI:10.3390/coatings12060742.
- 6 M. R. Islam, M. M. I. Khan, R. Al Rafid, F. Mehjabin, M. S. Rashid, J. A. Chowdhury, N. Zerine

and M. Islam, *Sens. Bio-Sensing Res.*, 2022, **35**, 100477.

7 I. Danlard, I. O. Mensah and E. K. Akowuah, *Optik (Stuttg.)*, 2022, **258**, 168893.
